# Supplementary material
Source: MDPI journal article supplement (https://www.mdpi.com/2076-3417/12/15/7763)
Supplement: s1 [file s1]

**Table S2.** Groups of components for preparation of acid whey-based culture media for cultivation of *L. plantarum* KB2 LAB 03.

| Group | Compounds                                        | Concentration (%) |
|-------|--------------------------------------------------|-------------------|
| A     | Yeast extract (BTL, Poland)                      | 0.8               |
|       | Peptone K (BTL, Poland)                          | 1.4               |
| M     | Ammonium citrate (Chempur, Poland)               | 0.2               |
|       | Dipotassium phosphate (Chempur, Poland)          | 0.2               |
|       | Sodium acetate (Chempur, Poland)                 | 0.5               |
|       | Magnesium sulfate heptahydrate (Chempur, Poland) | 0.02              |
|       | Magnesium sulfate tetrahydrate (Chempur, Poland) | 0.005             |

**Table S3.** Compositions of acid whey-based culture media for cultivation of *L. plantarum* KB2 LAB 03.

| Medium      | A [g / 100 mL] | M [g / 100 mL] |
|-------------|----------------|----------------|
| A100 M100   | 2.20           | 0.92           |
| A100 M50    | 2.20           | 0.46           |
| A100 M25    | 2.20           | 0.23           |
| A100 M12.5  | 2.20           | 0.12           |
| A50 M100    | 1.10           | 0.28           |
| A50 M50     | 1.10           | 0.46           |
| A50 M25     | 1.10           | 0.23           |
| A50 M12.5   | 1.10           | 0.12           |
| A25 M100    | 0.56           | 0.28           |
| A25 M50     | 0.56           | 0.46           |
| A25 M25     | 0.56           | 0.23           |
| A25 M12.5   | 0.56           | 0.12           |
| A12.5 M100  | 0.28           | 0.28           |
| A12.5 M50   | 0.28           | 0.46           |
| A12.5 M25   | 0.28           | 0.23           |
| A12.5 M12.5 | 0.28           | 0.12           |
