# Supplementary material
Source: MDPI journal article supplement (https://www.mdpi.com/2076-3417/12/15/7763)
Supplement: s1 [file s1]

**Table S1.** Antimicrobial activity of lactic acid bacteria against potato pathogens.

| Strain                                                         | Origin | Phytopathogen growth inhibition zone [mm] |                            |                             |                          |                              |                                |                           |                     |                                   |                             |
|----------------------------------------------------------------|--------|-------------------------------------------|----------------------------|-----------------------------|--------------------------|------------------------------|--------------------------------|---------------------------|---------------------|-----------------------------------|-----------------------------|
|                                                                |        | <i>Fusarium oxysporum</i>                 | <i>Fusarium sambucinum</i> | <i>Alternaria alternata</i> | <i>Alternaria solani</i> | <i>Alternaria tenuissima</i> | <i>Colletotrichum coccodes</i> | <i>Rhizoctonia solani</i> | <i>Phoma exigua</i> | <i>Pectobacterium carotovorum</i> | <i>Streptomyces scabiei</i> |
| <i>Lactococcus lactis</i> subsp. <i>lactis</i> ŁOCK876         | ŁOCK   | 0.0±0.0                                   | 0.0±0.0                    | 0.0±0.0                     | 0.0±0.0                  | 0.0±0.0                      | 0.0±0.0                        | 0.0±0.0                   | 0.0±0.0             | 0.0±0.0                           | 9.7±0.6                     |
| <i>Lactococcus lactis</i> subsp. <i>lactis</i> ŁOCK875         | ŁOCK   | 0.0±0.0                                   | 0.0±0.0                    | 0.0±0.0                     | 0.0±0.0                  | 0.0±0.0                      | 0.0±0.0                        | 0.0±0.0                   | 0.0±0.0             | 0.0±0.0                           | 0.0±0.0                     |
| <i>Lactococcus lactis</i> subsp. <i>Lactis</i> ŁOCK874         | ŁOCK   | 0.0±0.0                                   | 0.0±0.0                    | 0.0±0.0                     | 0.0±0.0                  | 0.0±0.0                      | 0.0±0.0                        | 0.0±0.0                   | 0.0±0.0             | 2.3±0.6                           | 10.7±0.6                    |
| <i>Lactococcus lactis</i> subsp. <i>lactis</i> ŁOCK873         | ŁOCK   | 0.0±0.0                                   | 0.0±0.0                    | 0.0±0.0                     | 0.0±0.0                  | 0.0±0.0                      | 0.0±0.0                        | 0.0±0.0                   | 0.0±0.0             | 2.0±0.0                           | 0.0±0.0                     |
| <i>Lactococcus lactis</i> subsp. <i>lactis</i> ŁOCK872         | ŁOCK   | 0.0±0.0                                   | 0.0±0.0                    | 0.0±0.0                     | 0.0±0.0                  | 0.0±0.0                      | 0.0±0.0                        | 0.0±0.0                   | 0.0±0.0             | 2.3±0.6                           | 0.0±0.0                     |
| <i>Lactococcus lactis</i> subsp. <i>lactis</i> ŁOCK871         | ŁOCK   | 0.0±0.0                                   | 0.0±0.0                    | 0.0±0.0                     | 0.0±0.0                  | 0.0±0.0                      | 0.0±0.0                        | 0.0±0.0                   | 0.0±0.0             | 1.7±0.6                           | 10.7±1.5                    |
| <i>Lactococcus lactis</i> subsp. <i>lactis</i> ŁOCK870         | ŁOCK   | 0.0±0.0                                   | 0.0±0.0                    | 0.0±0.0                     | 0.0±0.0                  | 0.0±0.0                      | 0.0±0.0                        | 0.0±0.0                   | 0.0±0.0             | 3.3±0.6                           | 10.7±1.2                    |
| <i>Lactococcus lactis</i> subsp. <i>lactis</i> ŁOCK869         | ŁOCK   | 0.0±0.0                                   | 0.0±0.0                    | 0.0±0.0                     | 0.0±0.0                  | 0.0±0.0                      | 0.0±0.0                        | 0.0±0.0                   | 0.0±0.0             | 4.7±0.6                           | 0.0±0.0                     |
| <i>Lactococcus lactis</i> subsp. <i>cremoris</i> ŁOCK868       | ŁOCK   | 0.0±0.0                                   | 0.0±0.0                    | 0.0±0.0                     | 0.0±0.0                  | 0.0±0.0                      | 0.0±0.0                        | 0.0±0.0                   | 0.0±0.0             | 3.7±0.6                           | 0.0±0.0                     |
| <i>Leuconostoc mesenteroides</i> subs. <i>cremoris</i> ŁOCK884 | ŁOCK   | 0.0±0.0                                   | 0.0±0.0                    | 0.0±0.0                     | 0.0±0.0                  | 0.0±0.0                      | 0.0±0.0                        | 0.0±0.0                   | 0.0±0.0             | 4.7±0.6                           | 11.7±1.5                    |
| <i>Leuconostoc mesenteroides</i> subs. <i>cremoris</i> ŁOCK882 | ŁOCK   | 0.0±0.0                                   | 0.0±0.0                    | 0.0±0.0                     | 0.0±0.0                  | 0.0±0.0                      | 0.0±0.0                        | 0.0±0.0                   | 0.0±0.0             | 2.3±0.6                           | 0.0±0.0                     |
| <i>Leuconostoc mesenteroides</i> subs. <i>cremoris</i> ŁOCK879 | ŁOCK   | 0.0±0.0                                   | 0.0±0.0                    | 0.0±0.0                     | 0.0±0.0                  | 0.0±0.0                      | 0.0±0.0                        | 0.0±0.0                   | 0.0±0.0             | 2.0±0.0                           | 11.7±0.6                    |
| <i>Leuconostoc mesenteroides</i> subs. <i>cremoris</i> ŁOCK880 | ŁOCK   | 0.0±0.0                                   | 0.0±0.0                    | 0.0±0.0                     | 0.0±0.0                  | 0.0±0.0                      | 0.0±0.0                        | 0.0±0.0                   | 0.0±0.0             | 4.7±1.2                           | 11.0±1.0                    |
| <i>Leuconostoc mesenteroides</i> subs. <i>cremoris</i> ŁOCK881 | ŁOCK   | 0.0±0.0                                   | 0.0±0.0                    | 0.0±0.0                     | 0.0±0.0                  | 0.0±0.0                      | 0.0±0.0                        | 0.0±0.0                   | 0.0±0.0             | 2.0±0.0                           | 12.0±0.0                    |
| <i>Lacticaseibacillus casei</i> ŁOCK901                        | ŁOCK   | 0.0±0.0                                   | 0.0±0.0                    | 0.0±0.0                     | 0.0±0.0                  | 0.0±0.0                      | 4.0±1.0                        | 0.0±0.0                   | 0.0±0.0             | 7.0±1.0                           | 12.3±1.2                    |
| <i>Lacticaseibacillus casei</i> ŁOCK913                        | ŁOCK   | 2.0±0.0                                   | 1.3±0.6                    | 0.0±0.0                     | 0.0±0.0                  | 0.0±0.0                      | 6.0±1.0                        | 16.7±1.5                  | 0.0±0.0             | 10.0±0.0                          | 24.7±0.6                    |
| <i>Lactobacillus acidophilus</i> ŁOCK840                       | ŁOCK   | 2.0±0.0                                   | 1.7±0.6                    | 0.0±0.0                     | 6.0±1.0                  | 2.7±0.6                      | 3.0±1.0                        | 5.3±0.6                   | 0.0±0.0             | 4.0±1.0                           | 13.7±0.6                    |
| <i>Lactobacillus acidophilus</i> ŁOCK843                       | ŁOCK   | 2.7±1.2                                   | 2.0±0.0                    | 0.0±0.0                     | 5.0±0.0                  | 2.0±0.0                      | 4.7±1.2                        | 4.0±1.7                   | 0.0±0.0             | 11.0±1.0                          | 19.7±1.5                    |
| <i>Lactobacillus acidophilus</i> ŁOCK844                       | ŁOCK   | 0.0±0.0                                   | 1.7±0.6                    | 0.0±0.0                     | 1.3±0.6                  | 0.0±0.0                      | 8.0±2.0                        | 8.7±2.3                   | 0.0±0.0             | 7.7±0.6                           | 19.0±1.0                    |
| <i>Lactobacillus acidophilus</i> ŁOCK839                       | ŁOCK   | 2.0±0.0                                   | 4.3±0.6                    | 0.0±0.0                     | 10.7±2.3                 | 4.7±0.6                      | 6.3±1.5                        | 0.0±0.0                   | 1.3±0.6             | 10.7±0.6                          | 33.3±0.6                    |
| <i>Lactobacillus acidophilus</i> ŁOCK838                       | ŁOCK   | 0.0±0.0                                   | 0.0±0.0                    | 0.0±0.0                     | 1.7±0.6                  | 0.0±0.0                      | 6.0±1.0                        | 2.7±0.6                   | 0.0±0.0             | 36.0±1.0                          | 16.7±1.5                    |
| <i>Lactobacillus acidophilus</i> ŁOCK936                       | ŁOCK   | 3.7±0.6                                   | 4.7±1.5                    | 0.0±0.0                     | 15.7±1.2                 | 6.3±1.2                      | 8.0±2.0                        | 14.3±1.2                  | 1.0±0.0             | 7.0±1.0                           | 30.0±2.0                    |
| <i>Lactobacillus acidophilus</i> ŁOCK937                       | ŁOCK   | 2.0±0.0                                   | 6.0±1.0                    | 1.0±0.0                     | 13.3±1.5                 | 7.7±1.2                      | 7.0±1.0                        | 18.3±3.2                  | 1.0±0.0             | 11.0±1.0                          | 25.0±0.0                    |
| <i>Lactobacillus acidophilus</i> ŁOCK938                       | ŁOCK   | 3.3±0.6                                   | 5.0±1.0                    | 4.3±0.6                     | 8.3±1.5                  | 10.0±0.0                     | 8.0±2.6                        | 16.0±3.6                  | 1.0±0.0             | 10.0±0.0                          | 29.3±1.2                    |
| <i>Lactobacillus acidophilus</i> ŁOCK942                       | ŁOCK   | 3.0±1.0                                   | 6.3±0.6                    | 1.7±0.6                     | 8.0±2.0                  | 3.3±0.6                      | 9.0±1.0                        | 0.0±0.0                   | 0.0±0.0             | 10.3±0.6                          | 21.7±1.5                    |

|                                                                    |                   |         |          |         |          |          |          |          |          |          |          |
|--------------------------------------------------------------------|-------------------|---------|----------|---------|----------|----------|----------|----------|----------|----------|----------|
| <i>Lactobacillus acidophilus</i> LOCK935                           | LOCK              | 2.0±0.0 | 3.3±0.6  | 0.0±0.0 | 4.0±1.0  | 3.7±0.6  | 7.0±0.0  | 2.7±0.6  | 1.0±0.0  | 8.0±0.0  | 26.0±0.0 |
| <i>Lactobacillus acidophilus</i> LOCK928                           | LOCK              | 2.7±0.6 | 5.7±0.6  | 0.0±0.0 | 11.0±1.7 | 5.0±0.0  | 8.0±2.6  | 8.3±1.5  | 1.3±0.6  | 10.7±0.6 | 31.0±1.0 |
| <i>Lactobacillus acidophilus</i> LOCK927                           | LOCK              | 3.0±1.0 | 6.7±1.2  | 2.0±1.0 | 6.3±1.5  | 10.0±0.0 | 6.0±1.0  | 7.7±1.2  | 1.3±0.6  | 13.3±0.6 | 24.0±2.0 |
| <i>Lactobacillus acidophilus</i> LOCK926                           | LOCK              | 1.0±0.0 | 0.0±0.0  | 0.0±0.0 | 3.0±1.0  | 1.3±0.6  | 5.3±0.6  | 7.0±0.0  | 1.0±0.0  | 5.7±0.6  | 19.3±1.2 |
| <i>Lactobacillus acidophilus</i> LOCK932                           | LOCK              | 2.7±0.6 | 3.3±1.2  | 4.3±0.6 | 10.7±1.2 | 5.7±1.2  | 14.7±2.5 | 4.7±0.6  | 1.3±0.6  | 10.7±0.6 | 34.0±1.0 |
| <i>Lactobacillus acidophilus</i> LOCK946                           | LOCK              | 1.7±0.6 | 1.7±0.6  | 0.0±0.0 | 7.7±0.6  | 2.7±0.6  | 2.3±0.6  | 8.3±0.6  | 0.0±0.0  | 6.3±0.6  | 13.0±1.0 |
| <i>Lactobacillus acidophilus</i> LOCK931                           | LOCK              | 2.0±0.0 | 2.3±0.6  | 3.0±0.0 | 13.3±1.2 | 6.0±1.0  | 6.7±1.2  | 6.7±1.2  | 1.7±0.6  | 10.7±0.6 | 19.7±1.5 |
| <i>Lactobacillus acidophilus</i> LOCK929                           | LOCK              | 2.0±0.0 | 1.7±0.6  | 0.0±0.0 | 13.3±1.5 | 4.0±0.0  | 5.7±0.6  | 12.0±1.7 | 1.0±0.0  | 10.7±0.6 | 31.0±1.0 |
| <i>Lactobacillus acidophilus</i> LOCK934                           | LOCK              | 3.7±1.2 | 4.7±0.6  | 0.0±0.0 | 8.7±1.2  | 4.3±1.2  | 5.7±0.6  | 9.3±3.1  | 2.0±0.0  | 15.7±0.6 | 20.0±1.0 |
| <i>Lactiplantibacillus plantarum</i> LOCK859                       | LOCK              | 5.3±0.6 | 10.0±1.0 | 7.0±1.0 | 14.0±1.7 | 8.3±1.5  | 8.3±2.3  | 22.0±3.6 | 2.0±0.0  | 10.7±1.2 | 31.3±1.2 |
| <i>Lactiplantibacillus plantarum</i> LOCK860                       | LOCK              | 4.3±0.6 | 3.3±0.6  | 3.0±0.0 | 16.0±1.0 | 6.7±1.2  | 6.7±1.2  | 21.0±1.0 | 1.3±0.6  | 9.7±0.6  | 21.7±1.5 |
| <i>Lactiplantibacillus plantarum</i> LOCK861                       | LOCK              | 6.3±0.6 | 8.3±1.2  | 2.3±0.6 | 17.3±3.1 | 11.0±2.6 | 7.0±0.0  | 14.0±2.6 | 10.0±1.7 | 9.3±1.2  | 30.0±0.0 |
| <i>Lactiplantibacillus plantarum</i> LOCK862                       | LOCK              | 5.0±0.0 | 16.0±1.0 | 0.0±0.0 | 23.3±1.5 | 11.3±1.2 | 9.0±2.6  | 11.7±2.1 | 2.3±0.6  | 14.7±0.6 | 0.0±0.0  |
| <i>Lactiplantibacillus plantarum</i> LOCK864                       | LOCK              | 6.7±0.6 | 10.0±0.0 | 0.0±0.0 | 20.3±0.6 | 12.0±0.0 | 15.3±0.6 | 0.0±0.0  | 2.0±0.0  | 7.0±0.0  | 15.7±1.2 |
| <i>Lactiplantibacillus plantarum</i> syn. <i>cucumeris</i> LOCK865 | LOCK              | 1.3±0.6 | 5.7±0.6  | 2.7±0.6 | 12.0±1.0 | 6.7±0.6  | 7.0±2.6  | 3.7±1.5  | 1.3±0.6  | 2.3±0.6  | 25.3±0.6 |
| <i>Levilactobacillus brevis</i> LOCK952                            | LOCK              | 1.0±0.0 | 1.7±0.6  | 0.0±0.0 | 12.7±0.6 | 2.7±0.6  | 2.3±1.5  | 17.7±0.6 | 0.0±0.0  | 5.0±0.0  | 14.7±0.6 |
| <i>Lactobacillus acidophilus</i> LOCK 948                          | LOCK              | 2.0±0.0 | 4.0±0.0  | 1.0±0.0 | 10.7±1.2 | 4.0±1.0  | 8.0±1.7  | 10.0±2.0 | 2.7±1.2  | 5.7±0.6  | 16.3±1.5 |
| <i>Lactiplantibacillus plantarum</i> 0981                          | Pickled cucumbers | 4.0±0.0 | 2.0±0.0  | 0.0±0.0 | 14.7±0.6 | 5.0±0.0  | 5.0±0.0  | 13.7±1.5 | 0.0±0.0  | 6.0±0.0  | 22.7±1.2 |
| <i>Levilactobacillus brevis</i> 0983                               | Pickled cucumbers | 3.0±0.0 | 3.0±0.0  | 0.0±0.0 | 11.7±0.6 | 7.0±0.0  | 5.7±0.6  | 6.7±1.2  | 1.0±0.0  | 10.0±0.0 | 16.7±0.6 |
| <i>Levilactobacillus brevis</i> 0984                               | Sauerkraut        | 2.0±0.0 | 4.3±2.5  | 0.0±0.0 | 5.0±0.0  | 1.3±0.6  | 1.3±0.6  | 4.7±0.6  | 1.3±0.6  | 11.7±0.6 | 21.0±1.0 |
| <i>Lacticaseibacillus paracasei</i> 0985                           | Cow milk          | 5.7±0.6 | 2.0±0.0  | 0.0±0.0 | 18.7±1.2 | 3.0±0.0  | 5.7±0.6  | 11.7±1.5 | 0.0±0.0  | 11.0±0.0 | 16.0±1.0 |
| <i>Leuconostoc mesenteroides</i> 0986                              | Curdled milk      | 0.0±0.0 | 0.0±0.0  | 0.0±0.0 | 0.0±0.0  | 0.0±0.0  | 0.0±0.0  | 0.0±0.0  | 0.0±0.0  | 2.3±0.6  | 2.0±1.0  |
| <i>Lactiplantibacillus plantarum</i> 0989                          | Pickled cucumbers | 4.7±0.6 | 7.0±0.0  | 2.0±0.0 | 4.0±1.0  | 5.0±0.0  | 6.0±0.0  | 9.0±2.6  | 12.3±1.5 | 7.0±0.0  | 27.3±0.6 |
| <i>Lactiplantibacillus plantarum</i> 0990                          | Pickled cucumbers | 3.3±0.6 | 0.0±0.0  | 0.0±0.0 | 11.0±1.0 | 3.0±1.0  | 0.0±0.0  | 10.0±0.0 | 0.0±0.0  | 6.7±0.6  | 19.7±0.6 |
| <i>Lactiplantibacillus plantarum</i> 0991                          | Pickled cucumbers | 1.0±0.0 | 4.0±1.0  | 0.0±0.0 | 18.3±0.6 | 6.7±0.6  | 6.7±0.6  | 10.3±0.6 | 4.7±0.6  | 10.3±0.6 | 29.7±0.6 |
| <i>Lacticaseibacillus paracasei</i> 0993                           | Cow milk          | 5.0±0.0 | 0.0±0.0  | 0.0±0.0 | 2.0±0.0  | 4.7±1.5  | 4.3±0.6  | 11.0±2.0 | 0.0±0.0  | 10.0±0.0 | 14.0±0.0 |
| <i>Leuconostoc mesenteroides</i> 0994                              | Curdled milk      | 0.0±0.0 | 0.0±0.0  | 0.0±0.0 | 0.0±0.0  | 0.0±0.0  | 1.3±0.6  | 7.3±1.2  | 0.0±0.0  | 1.3±0.6  | 4.7±0.6  |
| <i>Lactiplantibacillus plantarum</i> 0995                          | Pickled cucumbers | 1.0±0.0 | 10.0±0.0 | 1.0±0.0 | 11.3±0.6 | 7.3±0.6  | 9.7±1.5  | 3.7±2.3  | 2.3±0.6  | 10.0±0.0 | 18.0±1.0 |
| <i>Lactiplantibacillus plantarum</i> 0996                          | Pickled cucumbers | 0.0±0.0 | 0.0±0.0  | 0.0±0.0 | 4.0±1.0  | 1.3±0.6  | 2.0±1.0  | 12.3±3.1 | 0.0±0.0  | 2.0±0.0  | 17.3±0.6 |
| <i>Lactiplantibacillus plantarum</i> KB2 LAB 03                    | Sauerkraut        | 7.0±1.2 | 3.0±0.0  | 3.0±0.0 | 19.0±1.0 | 12.0±0.0 | 11.3±0.6 | 20.0±1.7 | 4.0±0.0  | 16.0±0.0 | 31.0±1.0 |
| <i>Lactiplantibacillus plantarum</i> BWA(3) LAB                    | Beetroot          | 0.0±0.0 | 3.0±0.0  | 0.0±0.0 | 20.0±0.0 | 3.0±0.0  | 1.7±0.6  | 6.0±1.0  | 1.7±0.6  | 11.7±0.6 | 18.0±1.0 |
| <i>Lactiplantibacillus plantarum</i> KC1 LAB                       | Sauerkraut        | 3.0±0.0 | 7.7±0.6  | 0.0±0.0 | 12.7±0.6 | 9.3±1.2  | 3.7±0.6  | 3.7±1.2  | 0.0±0.0  | 8.0±0.0  | 22.7±1.2 |

|                                                   |                     |         |          |         |          |          |          |          |         |          |          |
|---------------------------------------------------|---------------------|---------|----------|---------|----------|----------|----------|----------|---------|----------|----------|
| <i>Lactiplantibacillus plantarum</i> BPB3 LAB     | Beetroot            | 1.7±0.6 | 8.0±0.0  | 0.0±0.0 | 18.3±0.6 | 8.3±1.5  | 2.3±1.2  | 12.7±4.0 | 0.0±0.0 | 2.7±0.6  | 15.0±0.0 |
| <i>Lactiplantibacillus plantarum</i> 0318B LAB    | Pickled cucumbers   | 3.3±0.6 | 6.3±0.6  | 0.0±0.0 | 18.3±0.6 | 9.3±1.5  | 6.0±0.0  | 2.7±1.5  | 2.0±0.0 | 10.0±0.0 | 25.3±0.6 |
| <i>Lactiplantibacillus plantarum</i> BWA3 LAB     | Beetroot            | 1.0±0.0 | 1.0±0.0  | 0.0±0.0 | 2.0±0.0  | 2.0±0.0  | 7.0±0.0  | 9.0±1.7  | 0.0±0.0 | 9.7±0.6  | 4.0±1.0  |
| <i>Lactiplantibacillus plantarum</i> BPC1         | Beetroot            | 0.0±0.0 | 1.3±0.6  | 0.0±0.0 | 2.3±0.6  | 0.0±0.0  | 4.3±0.6  | 0.0±0.0  | 0.0±0.0 | 8.0±0.0  | 14.3±0.6 |
| <i>Lactiplantibacillus plantarum</i> MC3 LEU      | Pickled carrot      | 7.3±0.6 | 8.0±0.0  | 0.0±0.0 | 16.0±1.0 | 7.7±0.6  | 19.0±1.0 | 0.0±0.0  | 0.0±0.0 | 5.0±1.0  | 0.0±0.0  |
| <i>Lactiplantibacillus plantarum</i> MB3 LAB      | Pickled carrot      | 2.3±0.6 | 10.0±0.0 | 2.0±0.0 | 4.0±1.0  | 4.0±0.0  | 5.0±0.0  | 9.0±1.0  | 0.0±0.0 | 14.0±0.0 | 0.0±0.0  |
| <i>Lactiplantibacillus plantarum</i> KC3 LAB      | Sauerkraut          | 2.7±0.6 | 6.0±0.0  | 1.0±0.0 | 15.0±0.0 | 9.0±0.0  | 7.3±0.6  | 0.0±0.0  | 1.0±0.0 | 5.0±1.0  | 0.0±0.0  |
| <i>Lactiplantibacillus plantarum</i> 02(3)18C LAB | Pickled cucumbers   | 3.7±0.6 | 4.3±1.2  | 0.0±0.0 | 10.7±1.2 | 7.3±0.6  | 10.0±0.0 | 10.3±0.6 | 2.7±0.6 | 10.0±0.0 | 0.0±0.0  |
| <i>Lactiplantibacillus plantarum</i> CC3 LEU      | Pickled onion       | 2.0±0.0 | 9.7±0.6  | 0.0±0.0 | 7.7±0.6  | 6.3±0.6  | 11.7±0.6 | 0.0±0.0  | 1.7±0.6 | 2.0±0.0  | 13.3±1.5 |
| <i>Lactiplantibacillus plantarum</i> BWA2         | Pickled beets       | 2.0±1.0 | 2.7±0.6  | 1.3±0.6 | 9.7±0.6  | 5.0±0.0  | 6.0±0.0  | 4.3±0.6  | 0.0±0.0 | 9.0±1.7  | 0.0±0.0  |
| <i>Lactiplantibacillus plantarum</i> MC3 LAB      | Pickled carrot      | 3.3±0.6 | 5.3±1.5  | 2.0±0.0 | 8.3±1.5  | 2.0±1.0  | 5.3±0.6  | 0.0±0.0  | 0.0±0.0 | 8.7±0.6  | 15.0±1.0 |
| <i>Lactiplantibacillus plantarum</i> CC3 LAB      | Pickled onion       | 3.0±0.0 | 3.7±0.6  | 1.7±0.6 | 7.7±0.6  | 2.0±0.0  | 5.3±0.6  | 15.0±1.0 | 1.7±0.6 | 7.0±0.0  | 0.0±0.0  |
| <i>Lactiplantibacillus plantarum</i> 02(2)18A LAB | Pickled cucumbers   | 3.0±0.0 | 5.0±0.0  | 1.3±0.6 | 17.7±0.6 | 5.0±0.0  | 6.0±0.0  | 12.0±1.0 | 1.0±0.0 | 9.3±1.2  | 0.0±0.0  |
| <i>Lactiplantibacillus plantarum</i> W12          | Pickled beet pulp   | 4.3±0.6 | 10.0±0.0 | 1.0±0.0 | 12.7±0.6 | 12.0±0.0 | 7.0±0.0  | 0.0±0.0  | 4.0±0.0 | 5.0±0.0  | 0.0±0.0  |
| <i>Lactobacillus</i> sp. W81                      | Pickled beet pulp   | 3.7±0.6 | 7.0±0.0  | 2.0±0.0 | 17.3±0.6 | 15.0±0.0 | 16.7±0.6 | 0.0±0.0  | 3.0±0.0 | 8.0±0.0  | 8.3±1.5  |
| <i>Levilactobacillus brevis</i> W3A               | Pickled beet pulp   | 2.0±0.0 | 3.3±0.6  | 1.0±0.0 | 9.7±0.6  | 4.0±0.0  | 8.0±0.0  | 0.0±0.0  | 3.0±0.0 | 9.3±0.6  | 0.0±0.0  |
| <i>Lactiplantibacillus plantarum</i> AX4          | Grass silage        | 3.3±0.6 | 6.0±0.0  | 0.0±0.0 | 12.7±1.2 | 2.0±0.0  | 4.7±0.6  | 0.0±0.0  | 2.0±0.0 | 6.0±0.0  | 0.0±0.0  |
| <i>Lactobacillus</i> sp. 4.                       | Pickled topinambour | 3.0±0.0 | 9.0±0.0  | 1.3±0.6 | 13.3±0.6 | 10.0±0.0 | 10.3±0.6 | 0.0±0.0  | 2.0±0.0 | 9.0±0.0  | 0.0±0.0  |
| <i>Lactobacillus</i> sp. 1.                       | Pickled topinambour | 0.0±0.0 | 1.0±0.0  | 0.0±0.0 | 6.3±0.6  | 2.7±0.6  | 7.0±0.0  | 12.0±1.0 | 0.0±0.0 | 8.7±1.2  | 0.0±0.0  |
| <i>Lactiplantibacillus plantarum</i> W12A         | Pickled beet pulp   | 2.3±0.6 | 8.3±0.6  | 0.0±0.0 | 15.0±0.0 | 8.7±1.2  | 10.0±0.0 | 0.0±0.0  | 2.0±0.0 | 0.0±0.0  | 0.0±0.0  |
| <i>Lactobacillus</i> sp. P1648.2                  | Beet leaves silage  | 6.0±0.0 | 14.0±0.0 | 1.0±0.0 | 17.7±0.6 | 7.0±0.0  | 10.0±0.0 | 0.0±0.0  | 3.0±0.0 | 12.0±0.0 | 9.3±0.6  |
| <i>Lactobacillus</i> sp. P162                     | Beet leaves silage  | 3.0±0.0 | 8.0±0.0  | 0.0±0.0 | 12.3±0.6 | 10.0±0.0 | 10.7±0.6 | 7.7±0.6  | 2.0±0.0 | 7.3±0.6  | 0.0±0.0  |
| <i>Lactobacillus</i> sp. K2                       | -                   | 3.0±1.0 | 3.0±0.0  | 1.7±0.6 | 2.3±0.6  | 3.3±1.2  | 5.0±0.0  | 0.0±0.0  | 0.0±0.0 | 10.0±0.0 | 0.0±0.0  |
| <i>Lactobacillus</i> sp. K1                       | -                   | 4.7±0.6 | 4.7±0.6  | 0.0±0.0 | 10.3±0.6 | 4.3±0.6  | 8.7±1.2  | 7.3±0.6  | 0.0±0.0 | 12.0±0.0 | 0.0±0.0  |
| <i>Leuconostoc mesenteroides</i> 5.               | Pickled topinambour | 5.0±0.0 | 10.0±0.0 | 7.3±0.6 | 14.7±0.6 | 10.0±0.0 | 7.7±0.6  | 0.0±0.0  | 0.0±0.0 | 12.0±0.0 | 0.0±0.0  |
| <i>Lactobacillus</i> sp. AXD                      | Grass silage        | 3.0±0.0 | 4.3±0.6  | 2.0±0.0 | 15.0±1.0 | 5.7±1.2  | 10.0±0.0 | 0.0±0.0  | 2.0±0.0 | 9.0±0.0  | 0.0±0.0  |
| <i>Lactiplantibacillus plantarum</i> ATCC         | -                   | 2.0±0.0 | 6.7±1.5  | 0.0±0.0 | 16.7±0.6 | 2.7±0.6  | 11.0±0.0 | 0.0±0.0  | 0.0±0.0 | 5.0±0.0  | 0.0±0.0  |

|                                                     |                     |         |         |         |          |          |          |          |         |          |          |
|-----------------------------------------------------|---------------------|---------|---------|---------|----------|----------|----------|----------|---------|----------|----------|
| <i>Leuconostoc mesenteroides</i> 7.                 | Pickled topinambour | 0.0±0.0 | 0.0±0.0 | 0.0±0.0 | 3.3±0.6  | 0.0±0.0  | 3.3±0.6  | 0.0±0.0  | 6.0±0.0 | 6.0±0.0  | 0.0±0.0  |
| <i>Lactobacillus farraginis</i> 6.                  | Pickled topinambour | 3.0±0.0 | 8.7±0.6 | 0.0±0.0 | 11.3±0.6 | 7.3±0.6  | 7.0±0.0  | 0.0±0.0  | 2.0±0.0 | 10.3±0.6 | 0.0±0.0  |
| <i>Lactiplantibacillus plantarum</i> MB2 LAB        | Pickled carrot      | 0.0±0.0 | 0.0±0.0 | 0.0±0.0 | 0.0±0.0  | 0.0±0.0  | 0.0±0.0  | 0.0±0.0  | 0.0±0.0 | 0.0±0.0  | 0.0±0.0  |
| <i>Lactiplantibacillus plantarum</i> BPA3 LAB       | Pickled beets       | 2.0±0.0 | 4.7±0.6 | 0.0±0.0 | 7.7±0.6  | 9.3±1.2  | 10.7±1.2 | 19.0±1.0 | 1.0±0.0 | 6.0±1.0  | 17.0±1.0 |
| <i>Lactiplantibacillus plantarum</i> 01(1)18B LAB   | Pickled cucumbers   | 2.0±0.0 | 4.0±0.0 | 0.0±0.0 | 14.3±0.6 | 9.0±1.0  | 10.0±0.0 | 14.7±0.6 | 3.3±0.6 | 8.0±0.0  | 19.3±1.2 |
| <i>Lactiplantibacillus plantarum</i> BPC3 LAB       | Pickled beets       | 0.0±0.0 | 0.0±0.0 | 0.0±0.0 | 0.0±0.0  | 0.0±0.0  | 0.0±0.0  | 0.0±0.0  | 0.0±0.0 | 0.0±0.0  | 0.0±0.0  |
| <i>Lactiplantibacillus plantarum</i> 01(1)18C LAB   | Pickled cucumbers   | 2.0±0.0 | 7.0±0.0 | 0.0±0.0 | 14.0±0.0 | 11.3±1.5 | 15.0±0.0 | 26.0±1.0 | 2.0±0.0 | 4.7±0.6  | 13.7±1.2 |
| <i>Lactobacillus plantarum</i> BPC2                 | Pickled beet        | 3.0±0.0 | 3.0±0.0 | 0.0±0.0 | 10.0±0.0 | 4.3±1.2  | 7.3±0.6  | 15.0±1.0 | 2.0±0.0 | 9.0±0.0  | 19.7±0.6 |
| <i>Lactiplantibacillus plantarum</i> 03(3)18C LAB   | Pickled cucumbers   | 2.3±0.6 | 0.0±0.0 | 0.0±0.0 | 11.0±1.0 | 2.3±0.6  | 6.0±0.0  | 9.3±1.2  | 0.0±0.0 | 3.0±0.0  | 15.0±0.0 |
| <i>Lactiplantibacillus plantarum</i> 02(3)18B LAB   | Pickled cucumbers   | 2.3±0.6 | 4.7±0.6 | 0.0±0.0 | 5.3±0.6  | 5.0±0.0  | 6.7±0.6  | 13.3±0.6 | 2.0±0.0 | 8.0±0.0  | 19.3±1.2 |
| <i>Lactobacillus pentosus</i> 03(2)118A LAB         | Pickled cucumbers   | 2.7±0.6 | 5.7±0.6 | 1.3±0.6 | 14.3±1.2 | 4.3±1.2  | 11.0±0.0 | 16.7±1.2 | 2.0±0.0 | 6.7±0.6  | 26.0±1.0 |
| <i>Lactiplantibacillus plantarum</i> MKA1 LEU       | Pickled carrot      | 2.0±0.0 | 0.0±0.0 | 0.0±0.0 | 2.7±0.6  | 2.0±0.0  | 6.0±0.0  | 13.7±0.6 | 0.0±0.0 | 3.0±0.0  | 14.7±0.6 |
| <i>Lactiplantibacillus plantarum</i> BWB(1) LAB     | Pickled beets       | 4.0±0.0 | 8.7±1.2 | 0.0±0.0 | 14.0±1.0 | 9.0±1.0  | 10.0±0.0 | 19.7±0.6 | 3.3±0.6 | 3.7±0.6  | 16.0±1.0 |
| <i>Lactiplantibacillus plantarum</i> BR1-2(3)18 LAB | Pickled broccoli    | 2.3±0.6 | 8.0±0.0 | 1.0±0.0 | 10.0±0.0 | 10.0±0.0 | 11.0±0.0 | 19.0±1.0 | 1.0±0.0 | 2.7±0.6  | 2.0±0.0  |
| <i>Lactiplantibacillus plantarum</i> BR1-1(3)18 LAB | Pickled broccoli    | 2.0±0.0 | 8.0±0.0 | 1.0±0.0 | 9.0±1.0  | 7.7±0.6  | 10.0±0.0 | 24.7±0.6 | 4.0±0.0 | 5.0±1.0  | 15.0±0.0 |
| <i>Lactiplantibacillus plantarum</i> BR1-2(3)25     | Pickled broccoli    | 1.0±0.0 | 7.7±0.6 | 0.0±0.0 | 8.7±1.2  | 9.0±1.0  | 9.0±1.0  | 17.0±1.0 | 3.0±0.0 | 5.3±0.6  | 14.7±0.6 |
| <i>Lactiplantibacillus plantarum</i> BR1-1(3)25 LAB | Pickled broccoli    | 2±0.6   | 4.3±0.6 | 0.0±0.0 | 7.7±0.6  | 4.7±0.6  | 12.0±1.0 | 0.0±0.6  | 2.0±0.0 | 3.0±0.0  | 15.0±0.0 |
